# Supplementary material
Source: publisher site journal article supplement (https://www.dovepress.com/get_supplementary_file.php?f=372577.docx)
Supplement: Supplementary file 1 [file get_supplementary_file.php]

**Supplementary Table 1. Formulas and grading of NITs**

| Index | Formula |
| --- | --- |
| Lok index, Grade 1/2/3  (<0.5/0.5–0.8/>0.8) [23] | Lok Index = e(LogOddsLok)/(1 + e(LogOddsLok))  Log Odds Lok = (1.26 × AST/ALT) + (5.27 × INR)− (0.0089 ×PLT×109) – 5.56 |
| King’s score, Grade 1/2/3 (<7.6/7.6–16.7/16.7) [24] | Age × AST × INR/[PLT (109/L)] |
| APRI[25] | [(AST/ULN)/ PLT (109/L) × 100 |
| FIB-4 index, Grade 1/2/3  (<1.45/1.45–3.25/>3.25) [26] | (Age× AST)/ PLT (109/L) × ALT1/2) |
| GPR[27] | GGT / ULN × 100 / PLT (109/L) |
| ALBI, Grade 1/2/3  (<−2.6/−2.6–≤−1.39 />−1.39)[28] | –0.085 × [Albumin (g/L) + log10 Bilirubin (mmol/L) × 0.66] |
| MELD, Grade 1/2/3  (<8/8–12/>12)[29] | 0.957 × Logₑ(creatinine mg/dL) + 0.378 × Logₑ(bilirubin mg/dL) + 1.120 × Logₑ(INR) + 0.6431 |
| MELD—Na, Grade 1/2/3  (<10/10-20 />20)[30] | MELD+1.59×[(135-Sna) (mmol/L))] |

ULN: upper limit of normal. GPR: γ-glutamyl transpeptidase/platelet ratio
